# Supplementary material for: Ligand rigidity and electronic effect on the complexation of hexavalent plutonyl with three dicarboxylic acids: a combined spectrophotometric and computational study
Source: Royal Society of Chemistry journal article supplement (doi:10.1039/d0nj00344a), 2020-01-01
Supplement: d0nj00344a1.pdf [file d0nj00344a1.pdf]

## *Electronic Supplementary Information*

### **Ligand Rigidity and Electronic Effect on the Complexation of Hexavalent Plutonyl with Three Dicarboxylic Acids: A Combined Spectrophotometric and Computational Study**

Lei Xu<sup>§</sup>, Ning Pu<sup>§</sup>, Jianhua Yuan, Pingping Wei, Xue Dong, Yingcai Wang, Jing Chen, Chao

Xu\*

Institute of Nuclear and New Energy Technology, Tsinghua University, Beijing 100084,  
China

### **Contents**

- 1. The supplementary data of Pu(VI) speciation diagrams during the titration process** Page 2
- 2. The supplementary structure of the 1:1 Pu(VI)/IDA complex** Page 2
- 3. The coordinates of the optimized structures of the three ligands using DFT methods.** Pages 3-4
- 4. The coordinates of the optimized structures of Pu(VI) complexes using DFT methods.** Pages 4-8

1. The supplementary data of Pu(VI) speciation diagrams during the titration process.

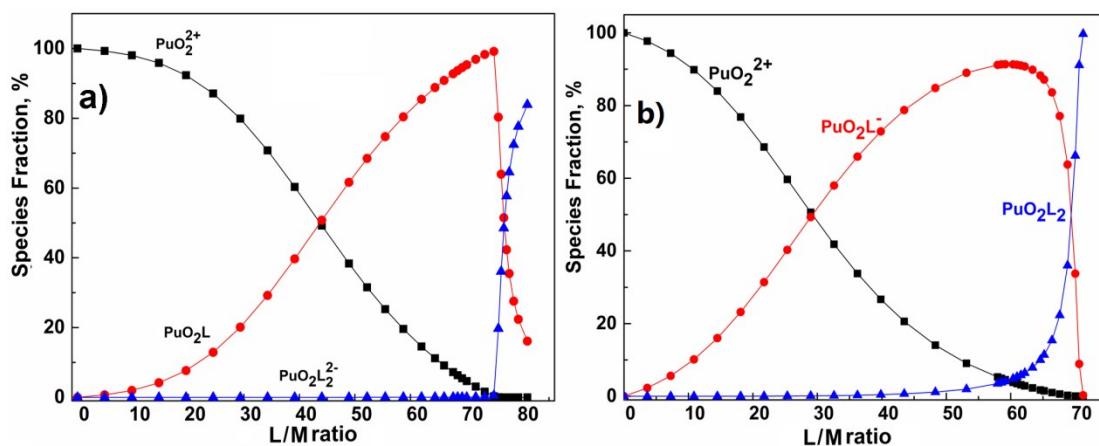

Fig. S1 Species fractions for the titrations of Pu(VI) with IDA a) and MIDA b) in  $I = 1.0$  mol/L NaClO<sub>4</sub> solution at 298K.

2. The supplementary structure of the 1:1 Pu(VI)/IDA complex.

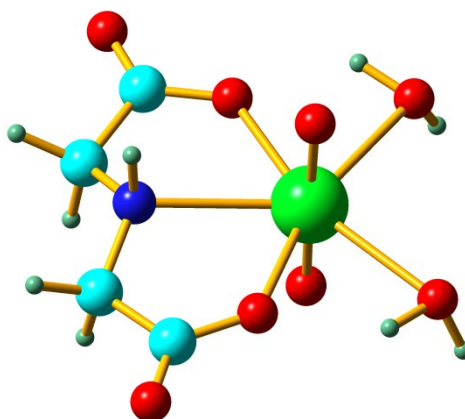

Fig. S2 The optimized structure of the 1:1 Pu(VI)/IDA complex with two coordinated water molecules. Grey-green, cyan, blue, red and green colors denote H, C, N, O and Pu atoms, respectively.

### 3. The coordinates of the optimized structures of the three ligands with DFT methods.

#### IDA<sup>2-</sup>

|   |              |             |              |
|---|--------------|-------------|--------------|
| C | -2.505922287 | 1.708847334 | 0.11168394   |
| C | -1.225507745 | 2.591101862 | -0.108084603 |
| O | -2.315053422 | 0.531014862 | 0.511241545  |
| C | 1.2259383    | 2.590914817 | -0.108109126 |
| C | 2.506224518  | 1.708465191 | 0.111617372  |
| O | 3.601353229  | 2.306954683 | -0.086050838 |
| O | 2.315186325  | 0.530645785 | 0.51113169   |
| H | -1.432956393 | 3.285466439 | -0.938762166 |
| H | -1.144575002 | 3.246719012 | 0.795084555  |
| H | 1.145127719  | 3.246533123 | 0.795070286  |
| H | 1.433469229  | 3.285258171 | -0.938783873 |
| O | -3.600965825 | 2.307515043 | -0.085914898 |
| N | 0.000156467  | 1.851723816 | -0.354219458 |
| H | 9.55072E-05  | 1.001590874 | 0.207829245  |

#### MIDA<sup>2-</sup>

|   |              |             |              |
|---|--------------|-------------|--------------|
| C | -2.632611155 | 1.948812321 | -0.000446228 |
| C | -1.204042814 | 2.585624495 | -0.212320198 |
| O | -2.752394521 | 0.90000357  | 0.683171191  |
| C | 1.204476135  | 2.585421275 | -0.212351799 |
| C | 2.632952728  | 1.948368794 | -0.000566807 |
| O | 3.541714232  | 2.618901287 | -0.566292923 |
| O | 2.752598846  | 0.899491955 | 0.682969712  |
| H | -1.109809048 | 2.747882639 | -1.294664326 |
| H | -1.258988031 | 3.611879301 | 0.226246485  |
| H | 1.259614488  | 3.611661558 | 0.226225207  |
| H | 1.110226071  | 2.747711981 | -1.294689554 |
| O | -3.541279069 | 2.619389806 | -0.566270693 |
| N | 0.000162205  | 1.886013198 | 0.24398547   |
| C | 0.000147865  | 1.708716199 | 1.6876605    |
| H | 0.000232393  | 2.688052765 | 2.232226566  |
| H | -0.905588053 | 1.162668618 | 1.960248494  |
| H | 0.905785179  | 1.16250814  | 1.960250013  |

#### DPA<sup>2-</sup>

|   |          |         |          |
|---|----------|---------|----------|
| C | 0.12681  | 5.72995 | -1.46317 |
| C | -0.00549 | 7.10901 | -1.70814 |
| C | -1.28815 | 7.6395  | -1.85789 |

|   |          |         |          |
|---|----------|---------|----------|
| C | -2.38564 | 6.78248 | -1.75907 |
| C | -2.15144 | 5.41731 | -1.51206 |
| N | -0.92084 | 4.88869 | -1.36479 |
| H | -1.43097 | 8.71216 | -2.05119 |
| H | 0.8841   | 7.74778 | -1.77848 |
| H | -3.41074 | 7.15814 | -1.87048 |
| C | 1.51661  | 5.08976 | -1.28941 |
| C | -3.32331 | 4.42526 | -1.39306 |
| O | 1.6184   | 3.81228 | -1.06343 |
| O | 2.58518  | 5.82813 | -1.36907 |
| O | -3.08643 | 3.16631 | -1.16433 |
| O | -4.54702 | 4.84881 | -1.52158 |

#### 4. The coordinates of the optimized structures of Pu(VI) complexes using DFT methods.

PuO<sub>2</sub>(IDA)(H<sub>2</sub>O)<sub>2</sub>

|    |          |          |          |
|----|----------|----------|----------|
| C  | -2.44254 | 1.57463  | -0.01182 |
| C  | -1.2534  | 2.53913  | -0.1866  |
| O  | -2.06684 | 0.32344  | 0.18717  |
| C  | 1.25345  | 2.53912  | -0.18661 |
| C  | 2.44257  | 1.57456  | -0.01201 |
| O  | 3.58652  | 1.96853  | -0.0949  |
| O  | 2.06684  | 0.3234   | 0.1871   |
| H  | -1.13359 | 2.71676  | -1.2614  |
| H  | -1.48565 | 3.50151  | 0.28315  |
| H  | 1.48575  | 3.50147  | 0.28318  |
| H  | 1.1336   | 2.71681  | -1.26138 |
| O  | -0.00002 | -0.47572 | -1.72255 |
| O  | 0.       | -0.87871 | 1.8064   |
| O  | -3.58648 | 1.96857  | -0.09501 |
| O  | 1.94803  | -2.32382 | -0.2432  |
| H  | 2.60434  | -1.63718 | 0.00919  |
| H  | 2.13763  | -2.51542 | -1.17717 |
| O  | -1.94807 | -2.32379 | -0.2432  |
| H  | -2.13765 | -2.51538 | -1.17718 |
| H  | -2.60437 | -1.63711 | 0.00911  |
| N  | 0.00002  | 1.93858  | 0.32075  |
| H  | 0.00003  | 2.01069  | 1.33985  |
| Pu | -0.00001 | -0.62752 | 0.05256  |

PuO<sub>2</sub>(MIDA)(H<sub>2</sub>O)<sub>2</sub>

|    |          |          |          |
|----|----------|----------|----------|
| C  | -2.40499 | 1.62326  | -0.02024 |
| C  | -1.21878 | 2.59993  | -0.04984 |
| O  | -2.04581 | 0.35687  | -0.01787 |
| C  | 1.21922  | 2.59976  | -0.04984 |
| C  | 2.40526  | 1.62289  | -0.02035 |
| O  | 3.53987  | 2.05082  | 0.00127  |
| O  | 2.04587  | 0.35656  | -0.01816 |
| H  | -1.30648 | 3.2633   | -0.91836 |
| H  | -1.227   | 3.20974  | 0.86229  |
| H  | 1.22758  | 3.20952  | 0.86233  |
| H  | 1.307    | 3.26316  | -0.91833 |
| O  | -0.00019 | -0.89314 | -1.73705 |
| O  | 0.00006  | -0.599   | 1.79395  |
| O  | -3.53953 | 2.05138  | 0.00126  |
| O  | 1.93737  | -2.35155 | 0.04861  |
| H  | 2.61227  | -1.66448 | 0.23518  |
| H  | 2.13861  | -2.6544  | -0.85334 |
| O  | -1.93774 | -2.35129 | 0.04846  |
| H  | -2.1389  | -2.65384 | -0.85361 |
| H  | -2.61256 | -1.66418 | 0.23514  |
| N  | 0.00017  | 1.85098  | -0.12469 |
| C  | 0.0002   | 2.26787  | 1.28496  |
| H  | 0.00028  | 3.33641  | 1.34088  |
| H  | -0.87348 | 1.8854   | 1.77003  |
| H  | 0.87382  | 1.88526  | 1.77003  |
| Pu | -0.00006 | -0.63866 | 0.02417  |

PuO<sub>2</sub>(DPA)(H<sub>2</sub>O)<sub>2</sub>

|   |              |              |              |
|---|--------------|--------------|--------------|
| C | -2.153491774 | 1.14688375   | -0.075636617 |
| C | -3.551836893 | 1.175877947  | -0.042498284 |
| C | -4.243124214 | -0.036542168 | 0.019907333  |
| C | -3.523040731 | -1.236174666 | 0.055370992  |
| C | -2.127293208 | -1.182651093 | -0.010457121 |
| N | -1.477234637 | -0.012182192 | -0.08406932  |
| H | -5.335744067 | -0.045646644 | .047344176   |
| H | -4.054561028 | 2.138294525  | -0.05882155  |
| H | -4.004644096 | -2.204645079 | 0.129610508  |
| C | -1.28724458  | 2.392232681  | -0.070346389 |
| C | -1.233476033 | -2.40955609  | 0.005616522  |
| O | -0.008102798 | 2.102993577  | -0.073689377 |
| O | -1.781780524 | 3.506254183  | -0.055780988 |
| O | 0.027932456  | -2.102591503 | -0.175681347 |
| O | -1.698976366 | -3.524239844 | 0.167516739  |

|    |             |              |              |
|----|-------------|--------------|--------------|
| O  | 2.52520499  | 2.001068289  | 0.457867875  |
| H  | 3.307949565 | 2.225581376  | -0.05168103  |
| H  | 1.838513227 | 2.682167312  | 0.284337573  |
| O  | 2.585629545 | -2.006479176 | -0.004187583 |
| H  | 1.850171625 | -2.643328004 | -0.106846913 |
| H  | 3.290261003 | -2.234987425 | -0.593763157 |
| Pu | 0.986165864 | 0.010776526  | -0.007900814 |
| O  | 0.794338278 | -0.072337482 | 1.720221859  |
| O  | 1.239023118 | 0.10213492   | -1.737611737 |

[PuO<sub>2</sub>(IDA)<sub>2</sub>]<sup>2-</sup>

|    |          |          |          |
|----|----------|----------|----------|
| C  | 2.51834  | -2.4401  | -0.15877 |
| C  | 3.46426  | -1.23921 | 0.0853   |
| O  | 1.27913  | -2.11054 | -0.25798 |
| C  | 3.45986  | 1.24793  | 0.09242  |
| C  | 2.50929  | 2.44669  | -0.14401 |
| O  | 2.99543  | 3.57993  | -0.19308 |
| O  | 1.27136  | 2.11282  | -0.24484 |
| H  | 3.61969  | -1.15406 | 1.16851  |
| H  | 4.44553  | -1.43871 | -0.3741  |
| H  | 4.44016  | 1.45382  | -0.36625 |
| H  | 3.61615  | 1.15695  | 1.17502  |
| O  | 0.67482  | -0.00556 | 1.80151  |
| O  | -0.11769 | 0.00306  | -1.70118 |
| O  | 3.00888  | -3.57115 | -0.21466 |
| N  | 2.84288  | 0.00457  | -0.36855 |
| H  | 2.78738  | 0.00738  | -1.38642 |
| C  | -2.82975 | 1.79408  | 0.35062  |
| C  | -3.63376 | 1.23727  | -0.86044 |
| O  | -1.59596 | 1.42071  | 0.46245  |
| C  | -3.65122 | -1.23438 | -0.831   |
| C  | -2.83049 | -1.79332 | 0.36774  |
| O  | -3.39572 | -2.60925 | 1.09902  |
| O  | -1.59033 | -1.43469 | 0.45226  |
| H  | -4.68233 | 1.17717  | -0.54363 |
| H  | -3.59151 | 2.04144  | -1.61285 |
| H  | -3.65044 | -2.05273 | -1.56944 |
| H  | -4.68938 | -1.14036 | -0.48943 |
| O  | -3.39908 | 2.62045  | 1.06687  |
| N  | -3.26676 | -0.00919 | -1.5166  |
| H  | -2.27125 | -0.01854 | -1.73035 |
| Pu | 0.17236  | -0.00174 | 0.0799   |

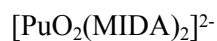

|    |          |          |          |
|----|----------|----------|----------|
| C  | 0.08443  | 2.41361  | -2.39122 |
| C  | 0.66238  | 3.27649  | -1.24056 |
| O  | -0.42313 | 1.2986   | -1.99163 |
| C  | 0.66276  | 3.27628  | 1.24028  |
| C  | 0.08471  | 2.41365  | 2.39103  |
| O  | 0.14971  | 2.84127  | 3.54656  |
| O  | -0.4244  | 1.29943  | 1.99126  |
| H  | 1.72146  | 3.0193   | -1.12327 |
| H  | 0.59699  | 4.34513  | -1.5139  |
| H  | 0.59785  | 4.34495  | 1.51362  |
| H  | 1.72171  | 3.01866  | 1.12278  |
| O  | 1.73916  | 0.42519  | 0.0004   |
| O  | -1.73916 | -0.42519 | -0.0004  |
| O  | 0.14938  | 2.84114  | -3.54678 |
| N  | -0.02767 | 2.95244  | -0.00008 |
| C  | -0.08471 | -2.41365 | -2.39103 |
| C  | -0.66276 | -3.27628 | -1.24028 |
| O  | 0.4244   | -1.29943 | -1.99126 |
| C  | -0.66238 | -3.27649 | 1.24056  |
| C  | -0.08443 | -2.41361 | 2.39122  |
| O  | -0.14938 | -2.84114 | 3.54678  |
| O  | 0.42313  | -1.2986  | 1.99163  |
| H  | -1.72171 | -3.01866 | -1.12278 |
| H  | -0.59785 | -4.34495 | -1.51362 |
| H  | -0.59699 | -4.34513 | 1.5139   |
| H  | -1.72146 | -3.0193  | 1.12327  |
| O  | -0.14971 | -2.84127 | -3.54656 |
| N  | 0.02767  | -2.95244 | 0.00008  |
| C  | -1.39631 | 3.46444  | 0.00015  |
| H  | -1.41781 | 4.57303  | 0.00108  |
| H  | -1.92084 | 3.10134  | -0.88694 |
| H  | -1.92106 | 3.09971  | 0.88642  |
| C  | 1.39631  | -3.46444 | -0.00015 |
| H  | 1.41781  | -4.57303 | -0.00108 |
| H  | 1.92106  | -3.09971 | -0.88642 |
| H  | 1.92084  | -3.10134 | 0.88694  |
| Pu | 0.       | 0.       | 0.       |

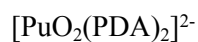

|   |          |         |          |
|---|----------|---------|----------|
| C | -0.08329 | 5.72045 | -1.30305 |
| C | -0.21559 | 7.0995  | -1.54802 |

|    |          |          |          |
|----|----------|----------|----------|
| C  | -1.49824 | 7.62999  | -1.69776 |
| C  | -2.59574 | 6.77297  | -1.59894 |
| C  | -2.36153 | 5.40781  | -1.35193 |
| N  | -1.13094 | 4.87919  | -1.20467 |
| H  | -1.64107 | 8.70266  | -1.89107 |
| H  | 0.674    | 7.73827  | -1.61836 |
| H  | -3.62084 | 7.14864  | -1.71035 |
| C  | 1.30651  | 5.08025  | -1.12929 |
| C  | -3.5334  | 4.41576  | -1.23293 |
| O  | 1.4083   | 3.80278  | -0.9033  |
| O  | 2.37508  | 5.81863  | -1.20895 |
| O  | -3.29652 | 3.15681  | -1.0042  |
| O  | -4.75712 | 4.83931  | -1.36146 |
| Pu | -0.92296 | 2.21227  | -0.66493 |
| O  | -1.32008 | 2.73133  | 1.12977  |
| O  | -0.52584 | 1.69322  | -2.45964 |
| C  | 0.61608  | -1.30573 | 0.00627  |
| C  | 0.80946  | -2.69031 | 0.16394  |
| C  | -0.31347 | -3.51739 | 0.22704  |
| C  | -1.5804  | -2.93899 | 0.13166  |
| C  | -1.67148 | -1.54368 | -0.02448 |
| N  | -0.59871 | -0.73087 | -0.08746 |
| H  | -0.20188 | -4.60396 | 0.35072  |
| H  | 1.82334  | -3.1043  | 0.2348   |
| H  | -2.48913 | -3.55262 | 0.17668  |
| C  | 1.81757  | -0.34539 | -0.06974 |
| C  | -3.04223 | -0.85058 | -0.13526 |
| O  | 1.61824  | 0.93223  | -0.21575 |
| O  | 3.02867  | -0.81432 | 0.01225  |
| O  | -3.10591 | 0.44115  | -0.2793  |
| O  | -4.13284 | -1.55865 | -0.08452 |
